# Supplementary material for: Deciphering potential vascularization factors of on-chip co-cultured hiPSC-derived cerebral organoids
Source: Royal Society of Chemistry journal article supplement (doi:10.1039/d3lc00930k), 2024-01-01
Supplement: d3lc00930k2.pdf [file d3lc00930k2.pdf]

## Supplementary Materials for

### **Deciphering potential vascularization factors of on-chip co-cultured hiPSC-derived cerebral organoids**

Maneesha Shaji,<sup>1</sup> Atsushi Tamada,<sup>2</sup> Kazuya Fujimoto,<sup>1</sup> Keiko Muguruma,<sup>2\*</sup> Stanislav L. Karsten,<sup>1\*</sup> Ryuji Yokokawa<sup>1\*</sup>

\*Corresponding authors. Email: muguruke@hirakata.kmu.ac.jp, karsten.stanislav.3i@kyoto-u.ac.jp, and yokokawa.ryuji.8c@kyoto-u.ac.jp

#### **This PDF file includes:**

Table S1

**Table S1.**

Angiogenesis-related genes with altered expression at days 31 and 35 of CO-VB co-culture identified with DAVID functional annotation clustering and GeneClip (GC) literature search. Growth factors are labeled with yellow.

| GenBank      | Gene Name                                                                         | 31/28 | P value | 35/28 | P value | DAVID | GC |
|--------------|-----------------------------------------------------------------------------------|-------|---------|-------|---------|-------|----|
| NM_002613    | 3-phosphoinositide dependent protein kinase 1 (PDPK1)                             | NA    | NA      | 0.2   | 0.038   |       | Y  |
| NM_001611    | acid phosphatase 5, tartrate resistant (ACP5)                                     | NA    | NA      | 2.1   | 0.031   |       | Y  |
| NM_207197    | ADAM metalloproteinase domain 15 (ADAM15)                                         | 2.6   | 0.011   | 0.7   | 0.071   | Y     | Y  |
| NM_000681    | adrenoceptor alpha 2A (ADRA2A)                                                    | 0.3   | 0.011   | 0.3   | 0.022   |       | Y  |
| NM_001124    | Adrenomedullin (ADM)                                                              | 17.8  | 0.002   | NA    | NA      | Y     | Y  |
| NM_198576    | Agrin (AGRN)                                                                      | 2.1   | 0.026   | 0.8   | 0.186   |       | Y  |
| NM_144497    | A-kinase anchoring protein 12 (AKAP12)                                            | 2.4   | 0.021   | 0.3   | 0.035   |       | Y  |
| NM_006738    | A-kinase anchoring protein 13 (AKAP13)                                            | 2.1   | 0.001   | 0.4   | 0.121   | Y     |    |
| NM_005163    | AKT serine/threonine kinase 1 (AKT1)                                              | 2.2   | 0.044   | 1.3   | 0.077   | Y     | Y  |
| NM_001628    | aldo-keto reductase family 1, member B (AKR1B1)                                   | 1.7   | 0.403   | 0.2   | 0.044   |       | Y  |
| NM_019109    | ALG1, chitobiosyldiphosphodolichol beta-mannosyltransferase (ALG1)                | 2.1   | 0.000   | 0.2   | 0.056   |       | Y  |
| NM_004757    | aminoacyl tRNA synthetase complex interacting multifunctional protein 1 (AIMP1)   | 1.4   | 0.115   | 0.3   | 0.022   |       | Y  |
| NM_139314    | angiopoietin like 4 (ANGPTL4)                                                     | 15.9  | 0.008   | NA    | NA      | Y     | Y  |
| NM_001002857 | annexin A2 (ANXA2)                                                                | 8.9   | 0.034   | 1.0   | 0.154   | Y     | Y  |
| NM_005883    | APC2, WNT signaling pathway regulator (APC2)                                      | 0.5   | 0.047   | 0.5   | 0.091   |       | Y  |
| NM_001302688 | apolipoprotein E(APOE)                                                            | 6.8   | 0.047   | 3.2   | 0.473   | Y     | Y  |
| NM_198098    | aquaporin 1 (Colton blood group) (AQP1)                                           | 5.9   | 0.041   | NA    | NA      | Y     | Y  |
| NM_020216    | arginyl aminopeptidase (RNPEP)                                                    | 2.1   | 0.026   | 0.4   | 0.059   |       | Y  |
| NM_012154    | argonaute 2, RISC catalytic component (AGO2)                                      | 1.0   | 0.382   | 0.3   | 0.046   |       | Y  |
| NM_032467    | aspartate beta-hydroxylase (ASPH)                                                 | 4.7   | 0.019   | 1.1   | 0.172   |       | Y  |
| NM_001251888 | ASPSCR1, UBX domain containing tether for SLC2A4 (ASPSCR1)                        | 2.1   | 0.004   | 0.4   | 0.057   |       | Y  |
| NM_001681    | ATPase sarcoplasmic/endoplasmic reticulum Ca <sup>2+</sup> transporting 2(ATP2A2) | NA    | NA      | 0.3   | 0.026   |       | Y  |

|              |                                                           |      |       |     |       |   |   |
|--------------|-----------------------------------------------------------|------|-------|-----|-------|---|---|
| NM_017749    | autophagy and beclin 1 regulator 1 (AMBRA1)               | 1.4  | 0.040 | 0.2 | 0.032 |   | Y |
| NM_004655    | axin 2 (AXIN2)                                            | 2.5  | 0.104 | 0.3 | 0.018 | Y |   |
| NM_001728    | basigin (Ok blood group) (BSG)                            | 4.7  | 0.008 | 0.8 | 0.131 |   | Y |
| NM_001170714 | BCAR1, Cas family scaffolding protein (BCAR1)             | 2.1  | 0.024 | 0.5 | 0.068 |   | Y |
| NM_004326    | B-cell CLL/lymphoma 9 (BCL9)                              | 0.8  | 0.131 | 0.3 | 0.033 |   | Y |
| NM_014739    | BCL2 associated transcription factor 1 (BCLAF1)           | 1.2  | 0.297 | 0.1 | 0.017 |   | Y |
| NM_004052    | BCL2 interacting protein 3 (BNIP3)                        | 4.2  | 0.032 | 1.8 | 0.364 |   | Y |
| NM_004048    | beta-2-microglobulin (B2M)                                | 6.7  | 0.035 | 0.8 | 0.162 |   | Y |
| NM_001145783 | BLOC-1 related complex subunit 8 (BORCS8)                 | 0.6  | 0.054 | 0.3 | 0.040 | Y |   |
| NM_001719    | bone morphogenetic protein 7 (BMP7)                       | 10.4 | 0.032 | NA  | NA    | Y | Y |
| NM_004329    | bone morphogenetic protein receptor type 1A (BMPR1A)      | 1.5  | 0.178 | 0.3 | 0.031 | Y | Y |
| NM_004333    | B-Raf proto-oncogene, serine/threonine kinase (BRAF)      | NA   | NA    | 0.5 | 0.030 |   | Y |
| NM_006317    | brain abundant membrane attached signal protein 1 (BASP1) | 0.6  | 0.065 | 0.4 | 0.049 | Y | Y |
| NM_005504    | branched chain amino acid transaminase 1 (BCAT1)          | 1.2  | 0.299 | 0.3 | 0.029 |   | Y |
| NM_001018055 | BRCA1/BRCA2-containing complex subunit 3 (BRCC3)          | 1.2  | 0.000 | 0.3 | 0.043 |   | Y |
| NM_206866    | BTB domain and CNC homolog 1 (BACH1)                      | 1.0  | 0.182 | 0.2 | 0.028 |   | Y |
| NM_006763    | BTG anti-proliferation factor 2 (BTG2)                    | 2.2  | 0.032 | 0.7 | 0.105 |   | Y |
| NM_001007793 | BUB3, mitotic checkpoint protein (BUB3)                   | 1.3  | 0.185 | 0.3 | 0.027 |   | Y |
| NM_006333    | C1D nuclear receptor corepressor (C1D)                    | 1.2  | 0.427 | 0.2 | 0.033 |   | Y |
| NM_007236    | calcineurin like EF-hand protein 1 (CHP1)                 | 1.3  | 0.362 | 0.5 | 0.034 |   | Y |
| NM_001748    | calpain 2 (CAPN2)                                         | 2.1  | 0.043 | 0.5 | 0.078 |   | Y |
| NM_004343    | Calreticulin (CALR)                                       | 2.8  | 0.005 | 0.8 | 0.220 | Y | Y |
| NM_033181    | cannabinoid receptor 1 (CNR1)                             | 0.5  | 0.117 | 0.3 | 0.040 |   | Y |
| NM_001190991 | canopy FGF signaling regulator 2 (CNPY2)                  | 2.2  | 0.026 | 0.6 | 0.100 |   | Y |
| NM_000067    | carbonic anhydrase 2 (CA2)                                | 8.7  | 0.049 | NA  | NA    |   | Y |
| NM_001873    | carboxypeptidase E (CPE)                                  | 1.0  | 0.291 | 0.3 | 0.045 | Y |   |
| NM_004346    | caspase 3 (CASP3)                                         | 0.7  | 0.134 | 0.3 | 0.035 |   | Y |
| NM_001904    | catenin beta 1 (CTNNB1)                                   | 1.3  | 0.066 | 0.3 | 0.042 | Y | Y |
| NM_002991    | C-C motif chemokine ligand 24 (CCL24)                     | 2.4  | 0.016 | 0.6 | 0.100 | Y |   |
| NM_005760    | CCAAT/enhancer binding protein zeta (CEBPZ)               | NA   | NA    | 0.3 | 0.035 |   | Y |

|              |                                                           |      |       |     |       |   |   |
|--------------|-----------------------------------------------------------|------|-------|-----|-------|---|---|
| NM_003418    | CCHC-type zinc finger nucleic acid binding protein (CNBP) | 2.2  | 0.005 | 0.5 | 0.073 |   | Y |
| NM_004357    | CD151 molecule (Raph blood group) (CD151)                 | 2.8  | 0.030 | 0.7 | 0.151 |   | Y |
| NM_001004196 | CD200 molecule (CD200)                                    | 0.3  | 0.017 | 0.5 | 0.080 |   | Y |
| NM_013230    | CD24 molecule (CD24)                                      | 0.4  | 0.038 | 0.3 | 0.042 |   | Y |
| NM_198793    | CD47 molecule (CD47)                                      | 2.6  | 0.021 | 1.1 | 0.294 |   | Y |
| NM_001257389 | CD63 molecule (CD63)                                      | 2.6  | 0.037 | 0.5 | 0.069 |   | Y |
| NM_004356    | CD81 molecule (CD81)                                      | 2.0  | 0.019 | 0.7 | 0.145 |   | Y |
| NM_006889    | CD86 molecule (CD86)                                      | 2.2  | 0.000 | 0.5 | 0.040 |   | Y |
| NM_018451    | centromere protein J (CENPJ)                              | 0.8  | 0.127 | 0.3 | 0.037 |   | Y |
| NM_000729    | Cholecystokinin (CCK)                                     | 22.4 | 0.035 | NA  | NA    |   | Y |
| NM_001130861 | claudin 5 (CLDN5)                                         | 22.4 | 0.041 | NA  | NA    | Y | Y |
| NM_005507    | cofilin 1 (CFL1)                                          | 0.8  | 0.103 | 0.3 | 0.038 |   | Y |
| NM_000089    | collagen type I alpha 2 chain (COL1A2)                    | 10.9 | 0.046 | 0.7 | 0.201 | Y |   |
| NM_000093    | collagen type V alpha 1 chain (COL5A1)                    | 6.7  | 0.030 | NA  | NA    | Y |   |
| NM_001848    | collagen type VI alpha 1 chain (COL6A1)                   | 3.4  | 0.037 | 0.9 | 0.176 |   | Y |
| NM_030582    | collagen type XVIII alpha 1 chain (COL18A1)               | 9.4  | 0.040 | 0.9 | 0.430 | Y | Y |
| NM_005694    | COX17, cytochrome c oxidase copper chaperone (COX17)      | 1.2  | 0.272 | 0.4 | 0.025 | Y |   |
| NM_181715    | CREB regulated transcription coactivator 2 (CRTC2)        | 2.3  | 0.001 | NA  | NA    |   | Y |
| NM_021198    | CTD small phosphatase 1 (CTDSP1)                          | 2.3  | 0.020 | 1.4 | 0.415 |   | Y |
| NM_001913    | cut like homeobox 1 (CUX1)                                | 2.3  | 0.029 | 0.5 | 0.095 |   | Y |
| NM_016463    | CXXC finger protein 5 (CXXC5)                             | 2.8  | 0.019 | 0.4 | 0.049 |   | Y |
| NM_001786    | cyclin dependent kinase 1 (CDK1)                          | 2.1  | 0.008 | 0.4 | 0.030 | Y |   |
| NM_000076    | cyclin dependent kinase inhibitor 1C (CDKN1C)             | 2.5  | 0.049 | 0.3 | 0.034 |   | Y |
| NM_004060    | cyclin G1 (CCNG1)                                         | 3.4  | 0.017 | NA  | NA    |   | Y |
| NM_000100    | cystatin B (CSTB)                                         | 2.3  | 0.042 | 0.4 | 0.071 |   | Y |
| NM_001554    | cysteine rich angiogenic inducer 61 (CYR61)               | 12.4 | 0.012 | NA  | NA    | Y | Y |
| NM_006825    | cytoskeleton associated protein 4 (CKAP4)                 | 2.1  | 0.025 | 0.4 | 0.041 |   | Y |
| NM_003836    | delta like non-canonical Notch ligand 1 (DLK1)            | 1.8  | 0.162 | 0.3 | 0.040 |   | Y |
| NM_001927    | Desmin (DES)                                              | 3.7  | 0.020 | NA  | NA    |   | Y |
| NM_001195573 | dicer 1, ribonuclease III (DICER1)                        | 0.9  | 0.147 | 0.3 | 0.028 |   | Y |

|              |                                                                     |     |       |      |       |   |   |
|--------------|---------------------------------------------------------------------|-----|-------|------|-------|---|---|
| NM_001098424 | discs large MAGUK scaffold protein 1 (DLG1)                         | 2.7 | 0.008 | 0.3  | 0.053 |   | Y |
| NM_019058    | DNA damage inducible transcript 4 (DDIT4)                           | 4.9 | 0.027 | 1.8  | 0.305 |   | Y |
| NM_005147    | DnaJ heat shock protein family (Hsp40) member A3 (DNAJA3)           | 1.9 | 0.018 | 0.4  | 0.039 |   | Y |
| NM_004734    | doublecortin like kinase 1 (DCLK1)                                  | NA  | NA    | 0.4  | 0.047 |   | Y |
| NM_001946    | dual specificity phosphatase 6 (DUSP6)                              | 3.7 | 0.001 | 0.9  | 0.217 |   | Y |
| NM_001363    | dyskerin pseudouridine synthase 1 (DKC1)                            | 1.6 | 0.051 | 0.3  | 0.012 |   | Y |
| NM_004021    | Dystrophin (DMD)                                                    | 3.9 | 0.039 | 0.4  | 0.096 |   | Y |
| NM_001964    | early growth response 1 (EGR1)                                      | 3.4 | 0.056 | 0.4  | 0.027 | Y | Y |
| NM_001039348 | EGF containing fibulin like extracellular matrix protein 1 (EFEMP1) | 5.0 | 0.017 | NA   | NA    |   | Y |
| NM_001167890 | EGF like domain multiple 6 (EGFL6)                                  | 4.7 | 0.046 | NA   | NA    |   | Y |
| NM_001419    | ELAV like RNA binding protein 1 (ELAVL1)                            | NA  | NA    | 0.3  | 0.039 |   | Y |
| NM_004456    | enhancer of zeste 2 polycomb repressive complex 2 subunit (EZH2)    | 0.7 | 0.069 | 0.2  | 0.028 |   | Y |
| NM_001005862 | erb-b2 receptor tyrosine kinase 2 (ERBB2)                           | 2.1 | 0.008 | 10.4 | 0.163 | Y | Y |
| NM_000123    | ERCC excision repair 5, endonuclease (ERCC5)                        | 1.4 | 0.435 | 0.3  | 0.023 |   | Y |
| NM_001172705 | eukaryotic translation initiation factor 4 gamma 2 (EIF4G2)         | 0.7 | 0.074 | 0.2  | 0.038 | Y |   |
| NM_001968    | eukaryotic translation initiation factor 4E (EIF4E)                 | 0.9 | 0.327 | 0.3  | 0.029 |   | Y |
| NM_014722    | family with sequence similarity 65 member B (FAM65B)                | 0.4 | 0.038 | 0.4  | 0.086 |   | Y |
| NM_001291303 | FAT atypical cadherin 4 (FAT4)                                      | NA  | NA    | 0.3  | 0.032 | Y |   |
| NM_018994    | F-box protein 42 (FBXO42)                                           | 2.1 | 0.053 | 0.4  | 0.048 |   | Y |
| NM_001134999 | fermitin family member 2 (FERMT2)                                   | 2.4 | 0.021 | 0.9  | 0.147 |   | Y |
| NM_004114    | fibroblast growth factor 13 (FGF13)                                 | 0.4 | 0.032 | 0.2  | 0.028 |   | Y |
| NM_023110    | fibroblast growth factor receptor 1 (FGFR1)                         | 2.8 | 0.006 | 0.9  | 0.227 | Y | Y |
| NM_022970    | fibroblast growth factor receptor 2 (FGFR2)                         | 5.6 | 0.041 | 0.6  | 0.067 | Y | Y |
| NM_000142    | fibroblast growth factor receptor 3 (FGFR3)                         | 1.2 | 0.429 | 0.4  | 0.038 |   | Y |
| NM_006486    | fibulin 1 (FBLN1)                                                   | 3.9 | 0.018 | 1.0  | 0.262 |   | Y |
| NM_001110556 | filamin A (FLNA)                                                    | 5.3 | 0.000 | 0.5  | 0.058 |   | Y |
| NM_007085    | follistatin like 1 (FSTL1)                                          | 6.7 | 0.048 | 1.2  | 0.286 |   | Y |
| NM_001244808 | forkhead box P1 (FOXP1)                                             | 2.7 | 0.014 | 0.7  | 0.144 | Y |   |
| NM_025135    | formin homology 2 domain containing 3 (FHOD3)                       | 1.5 | 0.455 | 0.4  | 0.045 | Y |   |
| NM_003505    | frizzled class receptor 1 (FZD1)                                    | 3.1 | 0.065 | 0.4  | 0.046 | Y |   |

|              |                                                                                                                         |      |       |     |       |   |   |
|--------------|-------------------------------------------------------------------------------------------------------------------------|------|-------|-----|-------|---|---|
| NM_173794    | FUN14 domain containing 1 (FUNDC1)                                                                                      | 1.2  | 0.370 | 0.3 | 0.037 |   | Y |
| NM_005274    | G protein subunit gamma 5 (GNG5)                                                                                        | 2.9  | 0.003 | 0.5 | 0.081 | Y |   |
| NM_032999    | general transcription factor Iii (GTF2I)                                                                                | 0.7  | 0.069 | 0.4 | 0.047 | Y | Y |
| NM_201397    | glutathione peroxidase 1 (GPX1)                                                                                         | 2.1  | 0.036 | 0.5 | 0.066 | Y | Y |
| NM_000852    | glutathione S-transferase pi 1 (GSTP1)                                                                                  | 2.3  | 0.009 | 2.1 | 0.158 |   | Y |
| NM_001164617 | glypican 3 (GPC3)                                                                                                       | 16.6 | 0.043 | 1.1 | 0.210 | Y | Y |
| NM_002087    | granulin precursor (GRN)                                                                                                | 2.8  | 0.017 | 0.8 | 0.174 |   | Y |
| NM_002045    | growth associated protein 43 (GAP43)                                                                                    | 0.6  | 0.078 | 0.4 | 0.034 |   | Y |
| NM_004864    | growth differentiation factor 15 (GDF15)                                                                                | 25.8 | 0.021 | 1.8 | 0.494 |   | Y |
| NM_001017963 | heat shock protein 90 alpha family class A member 1 (HSP90AA1)                                                          | 1.5  | 0.090 | 0.4 | 0.033 |   | Y |
| NM_007355    | heat shock protein 90 alpha family class B member 1 (HSP90AB1)                                                          | 1.2  | 0.427 | 0.3 | 0.043 |   | Y |
| NM_002154    | heat shock protein family A (Hsp70) member 4 (HSPA4)                                                                    | 1.0  | 0.285 | 0.3 | 0.041 |   | Y |
| NM_001540    | heat shock protein family B (small) member 1 (HSPB1)                                                                    | 3.2  | 0.019 | 1.2 | 0.337 | Y | Y |
| NM_002133    | heme oxygenase 1 (HMOX1)                                                                                                | 2.9  | 0.044 | 2.3 | 0.043 | Y | Y |
| NM_001291860 | heparan sulfate proteoglycan 2 (HSPG2)                                                                                  | 9.4  | 0.017 | 0.9 | 0.225 | Y | Y |
| NM_004494    | hepatoma-derived growth factor (HDGF)                                                                                   | 2.2  | 0.045 | 0.8 | 0.101 |   | Y |
| NM_005968    | heterogeneous nuclear ribonucleoprotein M (HNRNPM)                                                                      | 1.4  | 0.057 | 0.3 | 0.033 |   | Y |
| NM_033500    | hexokinase 1 (HK1)                                                                                                      | 2.4  | 0.022 | 1.3 | 0.184 |   | Y |
| NM_000189    | hexokinase 2 (HK2)                                                                                                      | 7.8  | 0.024 | 2.2 | 0.341 |   | Y |
| NM_002128    | high mobility group box 1 (HMGB1)                                                                                       | 0.7  | 0.097 | 0.3 | 0.034 | Y | Y |
| NM_004964    | histone deacetylase 1 (HDAC1)                                                                                           | 2.3  | 0.031 | 0.6 | 0.082 |   | Y |
| NM_001527    | histone deacetylase 2 (HDAC2)                                                                                           | 0.7  | 0.051 | 0.3 | 0.045 |   | Y |
| NM_152739    | homeobox A9 (HOXA9)                                                                                                     | 2.7  | 0.007 | 0.2 | 0.031 |   | Y |
| NM_198268    | homeodomain interacting protein kinase 1 (HIPK1)                                                                        | 2.3  | 0.044 | 0.5 | 0.083 | Y |   |
| NM_002775    | HtrA serine peptidase 1 (HTRA1)                                                                                         | 4.9  | 0.039 | 1.4 | 0.480 |   | Y |
| NM_033158    | hyaluronoglucosaminidase 2 (HYAL2)                                                                                      | 2.1  | 0.012 | 0.4 | 0.056 |   | Y |
| NM_000183    | hydroxyacyl-CoA dehydrogenase/3-ketoacyl-CoA thiolase/enoyl-CoA hydratase (trifunctional protein), beta subunit (HADHB) | 2.8  | 0.032 | 0.9 | 0.186 |   | Y |
| NM_181054    | hypoxia inducible factor 1 alpha subunit (HIF1A)                                                                        | 3.3  | 0.059 | 0.2 | 0.041 | Y | Y |
| NM_002165    | inhibitor of DNA binding 1, HLH protein (ID1)                                                                           | 7.4  | 0.034 | 0.5 | 0.063 | Y | Y |

|              |                                                               |      |       |     |       |   |   |
|--------------|---------------------------------------------------------------|------|-------|-----|-------|---|---|
| NM_002166    | inhibitor of DNA binding 2, HLH protein (ID2)                 | 2.8  | 0.022 | 0.6 | 0.110 | Y | Y |
| NM_001546    | inhibitor of DNA binding 4, HLH protein (ID4)                 | 0.5  | 0.041 | 0.3 | 0.051 |   | Y |
| NM_002221    | inositol-trisphosphate 3-kinase B (ITPKB)                     | 6.6  | 0.012 | NA  | NA    |   | Y |
| NM_000875    | insulin like growth factor 1 receptor (IGF1R)                 | 1.3  | 0.190 | 0.2 | 0.039 |   | Y |
| NM_006547    | insulin like growth factor 2 mRNA binding protein 3 (IGF2BP3) | 1.3  | 0.277 | 0.3 | 0.023 |   | Y |
| NM_000612    | insulin like growth factor 2 (IGF2)                           | 6.5  | 0.045 | 4.6 | 0.122 |   | Y |
| NM_000597    | insulin like growth factor binding protein 2 (IGFBP2)         | 2.5  | 0.017 | 1.4 | 0.361 |   | Y |
| NM_001013398 | insulin like growth factor binding protein 3 (IGFBP3)         | 6.6  | 0.016 | NA  | NA    |   | Y |
| NM_001253835 | insulin like growth factor binding protein 7 (IGFBP7)         | 21.0 | 0.049 | NA  | NA    |   | Y |
| NM_002210    | integrin subunit alpha V (ITGAV)                              | 3.4  | 0.019 | 0.6 | 0.091 | Y | Y |
| NM_133376    | integrin subunit beta 1 (ITGB1)                               | 2.7  | 0.044 | NA  | NA    | Y | Y |
| NM_000629    | interferon alpha and beta receptor subunit 1 (IFNAR1)         | NA   | NA    | 0.2 | 0.045 |   | Y |
| NM_003641    | interferon induced transmembrane protein 1 (IFITM1)           | 7.5  | 0.042 | 5.4 | 0.232 |   | Y |
| NM_015662    | intraflagellar transport 172 (IFT172)                         | 2.9  | 0.014 | 0.3 | 0.130 | Y |   |
| NM_003870    | IQ motif containing GTPase activating protein 1 (IQGAP1)      | 3.4  | 0.036 | 1.4 | 0.499 |   | Y |
| NM_002202    | ISL LIM homeobox 1 (ISL1)                                     | 0.4  | 0.041 | 0.2 | 0.018 | Y | Y |
| NM_145159    | jagged 2 (JAG2)                                               | 3.2  | 0.015 | 1.1 | 0.165 |   | Y |
| NM_002228    | Jun proto-oncogene, AP-1 transcription factor subunit (JUN)   | 1.0  | 0.244 | 0.3 | 0.041 | Y | Y |
| NM_000224    | keratin 18 (KRT18)                                            | 7.4  | 0.041 | NA  | NA    |   | Y |
| NM_005566    | lactate dehydrogenase A (LDHA)                                | 3.8  | 0.020 | 2.5 | 0.455 |   | Y |
| NM_006562    | ladybird homeobox 1 (LBX1)                                    | 2.1  | 0.026 | 0.6 | 0.155 | Y |   |
| NM_170707    | lamin A/C (LMNA)                                              | 3.7  | 0.029 | 0.5 | 0.072 | Y | Y |
| NM_004525    | LDL receptor related protein 2 (LRP2)                         | 2.4  | 0.125 | 0.3 | 0.021 | Y |   |
| NM_033300    | LDL receptor related protein 8 (LRP8)                         | 2.8  | 0.013 | 0.4 | 0.051 |   | Y |
| NM_014319    | LEM domain containing 3 (LEMD3)                               | NA   | NA    | 0.3 | 0.028 |   | Y |
| NM_005574    | LIM domain only 2 (LMO2)                                      | 2.2  | 0.054 | 0.7 | 0.154 |   | Y |
| NM_006769    | LIM domain only 4 (LMO4)                                      | 1.8  | 0.172 | 0.3 | 0.027 | Y |   |
| NM_014387    | linker for activation of T-cells (LAT)                        | NA   | NA    | 0.4 | 0.027 |   | Y |
| NM_006618    | lysine demethylase 5B (KDM5B)                                 | 2.0  | 0.026 | 0.9 | 0.183 |   | Y |
| NM_018407    | lysosomal protein transmembrane 4 beta (LAPTM4B)              | 2.3  | 0.008 | 0.3 | 0.047 |   | Y |

|              |                                                                          |      |       |      |       |   |   |
|--------------|--------------------------------------------------------------------------|------|-------|------|-------|---|---|
| NM_002116    | major histocompatibility complex, class I, A (HLA-A)                     | 3.7  | 0.015 | 1.3  | 0.342 |   | Y |
| NM_005514    | major histocompatibility complex, class I, B (HLA-B)                     | 4.3  | 0.036 | 1.2  | 0.317 |   | Y |
| NM_002127    | major histocompatibility complex, class I, G (HLA-G)                     | 4.0  | 0.013 | 1.2  | 0.350 |   | Y |
| NM_006039    | mannose receptor C type 2 (MRC2)                                         | 2.2  | 0.011 | 0.6  | 0.127 |   | Y |
| NM_002417    | marker of proliferation Ki-67 (MKI67)                                    | 1.9  | 0.203 | 0.4  | 0.034 |   | Y |
| NM_001190839 | matrix Gla protein (MGP)                                                 | 11.2 | 0.027 | NA   | NA    |   | Y |
| NM_018848    | McKusick-Kaufman syndrome (MKKS)                                         | 1.3  | 0.152 | 0.3  | 0.042 | Y |   |
| NM_014060    | MCTS1, re-initiation and release factor (MCTS1)                          | 0.8  | 0.106 | 0.3  | 0.034 |   | Y |
| NM_002393    | MDM4, p53 regulator (MDM4)                                               | 1.0  | 0.489 | 0.4  | 0.035 |   | Y |
| NM_006010    | mesencephalic astrocyte derived neurotrophic factor (MANF)               | 2.5  | 0.003 | 0.46 | 0.067 |   | Y |
| NM_002402    | mesoderm specific transcript (MEST)                                      | 2.2  | 0.045 | 0.3  | 0.049 |   | Y |
| NM_178812    | Metadherin (MTDH)                                                        | 1.3  | 0.050 | 0.4  | 0.046 | Y | Y |
| NM_005953    | metallothionein 2A (MT2A)                                                | 3.2  | 0.009 | 0.3  | 0.023 |   | Y |
| NM_004689    | metastasis associated 1 (MTA1)                                           | 2.2  | 0.020 | 0.5  | 0.079 |   | Y |
| NM_019852    | methyltransferase like 3 (METTL3)                                        | 0.9  | 0.151 | 0.3  | 0.033 |   | Y |
| NM_001012334 | midkine (neurite growth-promoting factor 2) (MDK)                        | 2.2  | 0.046 | 0.4  | 0.054 |   | Y |
| BX648603     | mitogen-activated protein kinase 4 (MAPK4)                               | 2.5  | 0.010 | 0.8  | 0.110 |   | Y |
| NM_001278548 | mitogen-activated protein kinase 8 (MAPK8)                               | NA   | NA    | 0.3  | 0.042 |   | Y |
| NM_002752    | mitogen-activated protein kinase 9 (MAPK9)                               | NA   | NA    | 0.2  | 0.034 |   | Y |
| NM_030662    | mitogen-activated protein kinase kinase 2 (MAP2K2)                       | 2.1  | 0.010 | 0.3  | 0.103 |   | Y |
| NM_002444    | Moesin (MSN)                                                             | 2.7  | 0.016 | 0.5  | 0.062 |   | Y |
| NM_000179    | mutS homolog 6 (MSH6)                                                    | 1.1  | 0.403 | 0.4  | 0.041 |   | Y |
| NM_004641    | myeloid/lymphoid or mixed-lineage leukemia; translocated to, 10 (MLLT10) | NA   | NA    | 2.6  | 0.041 |   | Y |
| NM_005920    | myocyte enhancer factor 2D (MEF2D)                                       | 3.5  | 0.014 | 0.6  | 0.104 | Y | Y |
| NM_144772    | NAD(P)HX epimerase (NAXE)                                                | 1.4  | 0.248 | 0.2  | 0.032 |   | Y |
| NM_021074    | NADH:ubiquinone oxidoreductase core subunit V2 (NDUFV2)                  | 0.9  | 0.245 | 0.3  | 0.048 | Y |   |
| NM_004553    | NADH:ubiquinone oxidoreductase subunit S6 (NDUFS6)                       | 1.3  | 0.115 | 0.3  | 0.045 | Y |   |
| NR_024388    | NCBP2 antisense RNA 2 (head to head) (NCBP2-AS2)                         | 1.3  | 0.228 | 0.4  | 0.048 |   | Y |
| NM_001042724 | nectin cell adhesion molecule 2 (NECTIN2)                                | 3.3  | 0.009 | 0.4  | 0.129 |   | Y |



|              |                                                                    |     |       |     |       |   |   |
|--------------|--------------------------------------------------------------------|-----|-------|-----|-------|---|---|
| NM_004495    | neuregulin 1 (NRG1)                                                | NA  | NA    | 0.4 | 0.007 | Y | Y |
| NM_001135659 | neurexin 1 (NRXN1)                                                 | 0.4 | 0.121 | 0.3 | 0.049 | Y | Y |
| NM_004796    | neurexin 3 (NRXN3)                                                 | NA  | NA    | 0.3 | 0.011 | Y |   |
| NM_002524    | neuroblastoma RAS viral oncogene homolog (NRAS)                    | NA  | NA    | 0.2 | 0.003 |   | Y |
| NM_001042492 | neurofibromin 1(NF1)                                               | NA  | NA    | 0.2 | 0.012 | Y | Y |
| NM_000905    | neuropeptide Y (NPY)                                               | 0.7 | 0.308 | 0.3 | 0.036 |   | Y |
| NM_020529    | NFKB inhibitor alpha (NFKBIA)                                      | 2.6 | 0.025 | 0.8 | 0.160 |   | Y |
| NM_007363    | non-POU domain containing, octamer-binding (NONO)                  | 1.4 | 0.214 | 0.4 | 0.047 |   | Y |
| NM_017617    | notch 1 (NOTCH1)                                                   | NA  | NA    | 0.2 | 0.023 | Y | Y |
| NM_024408    | notch 2 (NOTCH2)                                                   | 6.7 | 0.024 | 1.2 | 0.278 | Y |   |
| NM_000435    | notch 3 (NOTCH3)                                                   | 4.2 | 0.037 | 0.5 | 0.055 | Y | Y |
| NM_003204    | nuclear factor, erythroid 2 like 1 (NFE2L1)                        | 2.1 | 0.026 | 1.0 | 0.140 |   | Y |
| NM_006312    | nuclear receptor corepressor 2 (NCOR2)                             | 2.7 | 0.012 | 0.5 | 0.077 |   | Y |
| NM_003269    | nuclear receptor subfamily 2 group E member 1 (NR2E1)              | NA  | NA    | 0.4 | 0.043 | Y | Y |
| NM_005654    | nuclear receptor subfamily 2 group F member 1 (NR2F1)              | 2.8 | 0.030 | 0.4 | 0.053 | Y | Y |
| NM_005381    | Nucleolin (NCL)                                                    | 1.1 | 0.169 | 0.3 | 0.049 | Y | Y |
| NM_001037738 | Nucleophosmin (NPM1)                                               | 1.6 | 0.006 | 0.4 | 0.044 |   | Y |
| NM_138459    | NUS1 dehydrololichyl diphosphate synthase subunit (NUS1)           | 2.0 | 0.036 | 0.2 | 0.044 | Y | Y |
| NM_002412    | O-6-methylguanine-DNA methyltransferase (MGMT)                     | 3.3 | 0.033 | NA  | NA    |   | Y |
| NM_001173408 | obscurin like 1 (OBSL1)                                            | 2.0 | 0.034 | NA  | NA    | Y |   |
| NM_130837    | OPA1, mitochondrial dynamin like GTPase (OPA1)                     | 1.4 | 0.448 | 0.3 | 0.026 |   | Y |
| NM_014476    | PDZ and LIM domain 3 (PDLIM3)                                      | 5.1 | 0.026 | NA  | NA    | Y |   |
| NM_006457    | PDZ and LIM domain 5 (PDLIM5)                                      | 4.3 | 0.017 | 0.9 | 0.095 | Y |   |
| NM_000285    | peptidase D (PEPD)                                                 | 1.5 | 0.011 | 0.4 | 0.048 |   | Y |
| NM_001177306 | peptidylglycine alpha-amidating monooxygenase (PAM)                | 2.4 | 0.024 | 0.6 | 0.109 | Y |   |
| NM_006623    | phosphoglycerate dehydrogenase (PHGDH)                             | 2.5 | 0.001 | 1.4 | 0.215 |   | Y |
| NM_000291    | phosphoglycerate kinase 1 (PGK1)                                   | 2.1 | 0.032 | 0.9 | 0.237 |   | Y |
| NM_004339    | pituitary tumor-transforming 1 interacting protein (PTTG1IP)       | 2.0 | 0.011 | 0.5 | 0.082 |   | Y |
| NM_000930    | plasminogen activator, tissue type (PLAT)                          | 1.4 | 0.059 | 0.3 | 0.034 |   | Y |
| NM_000430    | platelet activating factor acetylhydrolase 1b regulatory subunit 1 | 2.9 | 0.014 | 0.4 | 0.117 |   | Y |

|              |                                                                                                |     |       |     |       |   |   |
|--------------|------------------------------------------------------------------------------------------------|-----|-------|-----|-------|---|---|
|              | (PAFAH1B1)                                                                                     |     |       |     |       |   |   |
| NM_001265594 | pleckstrin homology and RhoGEF domain containing G5 (PLEKHG5)                                  | 3.6 | 0.037 | 0.4 | 0.066 |   | Y |
| NM_002825    | Pleiotrophin (PTN)                                                                             | 8.0 | 0.032 | 1.3 | 0.357 | Y | Y |
| NM_198389    | Podoplanin (PDPN)                                                                              | 4.5 | 0.000 | NA  | NA    | Y | Y |
| NM_004073    | polo like kinase 3 (PLK3)                                                                      | 2.5 | 0.018 | NA  | NA    |   | Y |
| NM_000238    | potassium voltage-gated channel subfamily H member 2 (KCNH2)                                   | 0.4 | 0.037 | 0.3 | 0.054 |   | Y |
| NM_153026    | prickle planar cell polarity protein 1 (PRICKLE1)                                              | NA  | NA    | 0.3 | 0.030 | Y |   |
| NM_002583    | pro-apoptotic WT1 regulator (PAWR)                                                             | 3.4 | 0.012 | NA  | NA    |   | Y |
| NM_001040202 | progesterone and adipoQ receptor family member 3 (PAQR3)                                       | 0.7 | 0.031 | 0.4 | 0.043 |   | Y |
| NM_002634    | Prohibitin (PHB)                                                                               | 2.1 | 0.023 | 0.7 | 0.100 |   | Y |
| NM_001142595 | prolyl 4-hydroxylase subunit alpha 1 (P4HA1)                                                   | 5.0 | 0.029 | NA  | NA    |   | Y |
| NM_199418    | Prolylcarboxypeptidase (PRCP)                                                                  | 2.9 | 0.040 | 0.7 | 0.112 | Y | Y |
| NM_000954    | prostaglandin D2 synthase (PTGDS)                                                              | 6.4 | 0.039 | NA  | NA    |   | Y |
| NM_020440    | prostaglandin F2 receptor inhibitor (PTGFRN)                                                   | 2.0 | 0.025 | 0.3 | 0.088 |   | Y |
| NM_002806    | proteasome 26S subunit, ATPase 6 (PSMC6)                                                       | 1.1 | 0.474 | 0.3 | 0.038 |   | Y |
| NM_002813    | proteasome 26S subunit, non-ATPase 9 (PSMD9)                                                   | 1.1 | 0.289 | 0.3 | 0.033 |   | Y |
| NM_015568    | protein phosphatase 1 regulatory subunit 16B (PPP1R16B)                                        | NA  | NA    | 0.3 | 0.047 | Y |   |
| NM_006742    | protein serine kinase H1 (PSKH1)                                                               | 3.5 | 0.014 | 0.2 | 0.037 | Y |   |
| NM_002834    | protein tyrosine phosphatase, non-receptor type 11 (PTPN11)                                    | 2.0 | 0.225 | 0.4 | 0.030 | Y | Y |
| NM_002823    | prothymosin, alpha (PTMA)                                                                      | 1.1 | 0.262 | 0.4 | 0.027 |   | Y |
| NM_182470    | pyruvate kinase, muscle (PKM)                                                                  | 2.3 | 0.023 | 0.8 | 0.148 |   | Y |
| NM_002826    | quiescin sulfhydryl oxidase 1 (QSOX1)                                                          | 2.3 | 0.018 | 0.6 | 0.061 |   | Y |
| NM_014247    | Rap guanine nucleotide exchange factor 2 (RAPGEF2)                                             | 0.9 | 0.184 | 0.4 | 0.047 | Y |   |
| NM_018890    | ras-related C3 botulinum toxin substrate 1 (rho family, small GTP binding protein Rac1) (RAC1) | 2.2 | 0.035 | 0.5 | 0.082 |   | Y |
| NM_000321    | RB transcriptional corepressor 1 (RB1)                                                         | 1.3 | 0.090 | 0.3 | 0.035 |   | Y |
| NM_006098    | receptor for activated C kinase 1 (RACK1)                                                      | 2.2 | 0.012 | 0.8 | 0.196 |   | Y |
| NM_002928    | regulator of G-protein signaling 16 (RGS16)                                                    | 2.2 | 0.040 | 0.8 | 0.184 |   | Y |
| NM_001024809 | retinoic acid receptor alpha (RARA)                                                            | NA  | NA    | 0.4 | 0.026 | Y | Y |
| NM_005168    | Rho family GTPase 3 (RND3)                                                                     | 0.8 | 0.112 | 0.4 | 0.043 |   | Y |

|              |                                                                          |      |       |     |       |   |   |
|--------------|--------------------------------------------------------------------------|------|-------|-----|-------|---|---|
| NM_173728    | Rho guanine nucleotide exchange factor 15 (ARHGEF15)                     | 3.2  | 0.030 | 0.7 | 0.126 | Y |   |
| NM_014245    | ring finger protein 7 (RNF7)                                             | 2.1  | 0.028 | 1.1 | 0.195 |   | Y |
| NM_133631    | roundabout guidance receptor 1 (ROBO1)                                   | NA   | NA    | 0.4 | 0.019 | Y | Y |
| NM_002966    | S100 calcium binding protein A10 (S100A10)                               | 0.5  | 0.017 | 0.3 | 0.030 |   | Y |
| NM_000232    | sarcoglycan beta (SGCB)                                                  | 0.7  | 0.145 | 0.3 | 0.043 | Y |   |
| NM_005505    | scavenger receptor class B member 1 (SCARB1)                             | 2.8  | 0.039 | 1.0 | 0.166 |   | Y |
| NM_007190    | SEC23 interacting protein (SEC23IP)                                      | NA   | NA    | 0.4 | 0.035 |   | Y |
| NM_003012    | secreted frizzled related protein 1 (SFRP1)                              | 0.4  | 0.054 | 0.4 | 0.052 | Y | Y |
| NM_003013    | secreted frizzled related protein 2 (SFRP2)                              | NA   | NA    | 0.3 | 0.034 | Y | Y |
| NM_004636    | semaphorin 3B (SEMA3B)                                                   | 4.5  | 0.030 | 3.4 | 0.036 |   | Y |
| NM_006640    | septin 9 (SEPT9)                                                         | 1.6  | 0.067 | 0.3 | 0.046 |   | Y |
| NM_003017    | serine and arginine rich splicing factor 3 (SRSF3)                       | 1.0  | 0.319 | 0.2 | 0.021 |   | Y |
| NM_000455    | serine/threonine kinase 11 (STK11)                                       | 2.0  | 0.018 | 0.4 | 0.104 | Y | Y |
| NM_006282    | serine/threonine kinase 4 (STK4)                                         | 2.2  | 0.041 | 0.5 | 0.057 | Y |   |
| NM_002615    | serpin family F member 1 (SERPINF1)                                      | 12.9 | 0.042 | NA  | NA    | Y | Y |
| NM_001207014 | serpin family H member 1 (SERPINH1)                                      | 6.6  | 0.024 | 1.9 | 0.231 |   | Y |
| NR_033412    | SH3 domain containing GRB2 like 1, endophilin A2 pseudogene 1 (SH3GL1P1) | NA   | NA    | 0.4 | 0.009 |   | Y |
| NM_005067    | siah E3 ubiquitin protein ligase 2 (SIAH2)                               | 1.2  | 0.159 | 0.4 | 0.049 |   | Y |
| NM_173050    | signal peptide, CUB domain and EGF like domain containing 1 (SCUBE1)     | NA   | NA    | 0.2 | 0.005 | Y | Y |
| NM_003062    | slit guidance ligand 3 (SLIT3)                                           | 9.0  | 0.032 | NA  | NA    |   | Y |
| NM_005359    | SMAD family member 4 (SMAD4)                                             | 2.1  | 0.047 | 0.7 | 0.112 | Y | Y |
| NM_005631    | smoothened, frizzled class receptor (SMO)                                | 3.3  | 0.014 | 0.2 | 0.058 | Y | Y |
| NM_006516    | solute carrier family 2 member 1 (SLC2A1)                                | 9.4  | 0.009 | 1.2 | 0.310 |   | Y |
| NM_005415    | solute carrier family 20 member 1 (SLC20A1)                              | 2.8  | 0.031 | 0.7 | 0.115 |   | Y |
| NM_001048    | Somatostatin (SST)                                                       | 0.2  | 0.028 | 0.4 | 0.055 |   | Y |
| NM_003130    | Sorcin (SRI)                                                             | NA   | NA    | 0.5 | 0.018 | Y |   |
| NM_002970    | spermidine/spermine N1-acetyltransferase 1 (SAT1)                        | 3.3  | 0.012 | 0.7 | 0.155 | Y | Y |
| NM_005066    | splicing factor proline and glutamine rich (SFPQ)                        | 1.3  | 0.114 | 0.3 | 0.027 |   | Y |

|              |                                                                          |      |       |       |       |   |   |
|--------------|--------------------------------------------------------------------------|------|-------|-------|-------|---|---|
| NM_001258038 | sprouty RTK signaling antagonist 1 (SPRY1)                               | 2.8  | 0.025 | 0.5   | 0.065 |   | Y |
| NM_005842    | sprouty RTK signaling antagonist 2 (SPRY2)                               | 1.4  | 0.112 | 0.4   | 0.039 |   | Y |
| NM_014390    | staphylococcal nuclease and tudor domain containing 1 (SND1)             | 2.1  | 0.017 | 0.7   | 0.123 |   | Y |
| NM_003102    | superoxide dismutase 3, extracellular (SOD3)                             | 4.8  | 0.037 | NA    | NA    |   | Y |
| NM_003877    | suppressor of cytokine signaling 2 (SOCS2)                               | 0.9  | 0.208 | 0.3   | 0.038 |   | Y |
| NM_000344    | survival of motor neuron 1, telomeric (SMN1)                             | 2.0  | 0.001 | 0.7   | 0.099 |   | Y |
| NM_001006946 | syndecan 1 (SDC1)                                                        | 2.6  | 0.041 | 0.7   | 0.132 |   | Y |
| NM_003182    | tachykinin precursor 1 (TAC1)                                            | 0.3  | 0.195 | 0.2   | 0.025 |   | Y |
| NR_110492    | taurine up-regulated 1 (non-protein coding) (TUG1)                       | 0.7  | 0.063 | 0.3   | 0.037 |   | Y |
| NM_021961    | TEA domain transcription factor 1 (TEAD1)                                | 4.0  | 0.015 | 0.6   | 0.076 |   | Y |
| NR_001566    | telomerase RNA component (TERC)                                          | 2.9  | 0.047 | 0.8   | 0.147 |   | Y |
| NM_012473    | thioredoxin 2 (TXN2)                                                     | 2.3  | 0.129 | 0.4   | 0.049 |   | Y |
| NM_152295    | threonyl-tRNA synthetase (TARS)                                          | 1.7  | 0.004 | 0.3   | 0.034 |   | Y |
| NM_006288    | Thy-1 cell surface antigen (THY1)                                        | 0.4  | 0.028 | 0.8   | 0.126 | Y | Y |
| NM_003258    | thymidine kinase 1 (TK1)                                                 | 0.9  | 0.382 | 0.4   | 0.044 |   | Y |
| NM_001071    | thymidylate synthetase (TYMS)                                            | 1.5  | 0.022 | 0.4   | 0.050 |   | Y |
| NM_001032283 | Thymopoietin (TMPO)                                                      | NA   | NA    | 0.3   | 0.032 |   | Y |
| NM_014452    | TNF receptor superfamily member 21 (TNFRSF21)                            | 2.4  | 0.032 | 0.9   | 0.132 |   | Y |
| NM_148965    | TNF receptor superfamily member 25 (TNFRSF25)                            | 1.5  | 0.078 | 0.2   | 0.041 |   | Y |
| NR_024458    | TPT1 antisense RNA 1 (TPT1-AS1)                                          | 2.5  | 0.034 | 0.7   | 0.092 |   | Y |
| NM_003199    | transcription factor 4 (TCF4)                                            | 2.6  | 0.024 | 0.9   | 0.160 | Y | Y |
| NM_006521    | transcription factor binding to IGHM enhancer 3 (TFE3)                   | 3.3  | 0.008 | 0.7   | 0.134 |   | Y |
| NM_003236    | transforming growth factor alpha (TGFA)                                  | 3.2  | 0.013 | NA    | NA    | Y | Y |
| NM_004621    | transient receptor potential cation channel subfamily C member 6 (TRPC6) | 3.0  | 0.016 | 0.4   | 0.052 |   | Y |
| NM_001256530 | translocator protein (TSPO)                                              | 5.4  | 0.028 | 1.2   | 0.289 |   | Y |
| NM_000371    | Transthyretin (TTR)                                                      | 17.9 | 0.049 | 101.6 | 0.249 |   | Y |
| NM_000391    | tripeptidyl peptidase 1 (TPP1)                                           | 2.9  | 0.009 | 0.8   | 0.164 |   | Y |
| NM_001018005 | tropomyosin 1 (alpha) (TPM1)                                             | 3.4  | 0.033 | 0.2   | 0.095 | Y | Y |
| NM_000368    | tuberous sclerosis 1 (TSC1)                                              | NA   | NA    | 0.3   | 0.027 | Y | Y |

|              |                                                           |     |       |     |       |   |   |
|--------------|-----------------------------------------------------------|-----|-------|-----|-------|---|---|
| NM_001032288 | ubiquitin conjugating enzyme E2 V1 (UBE2V1)               | 1.0 | 0.329 | 0.3 | 0.043 |   | Y |
| NM_014517    | upstream binding protein 1 (LBP-1a) (UBP1)                | 1.3 | 0.273 | 0.3 | 0.048 | Y |   |
| NM_018949    | urotensin 2 receptor (UTS2R)                              | 2.8 | 0.026 | 0.6 | 0.069 | Y |   |
| NM_003369    | UV radiation resistance associated (UVRAG)                | 1.6 | 0.477 | 0.4 | 0.018 |   | Y |
| NM_001025370 | vascular endothelial growth factor A (VEGFA)              | 3.5 | 0.037 | 1.4 | 0.182 | Y | Y |
| NM_014909    | vasohibin 1 (VASH1)                                       | 2.0 | 0.014 | 0.5 | 0.062 | Y | Y |
| NM_004385    | Versican (VCAN)                                           | 0.5 | 0.064 | 0.2 | 0.025 |   | Y |
| NM_002467    | v-myc avian myelocytomatosis viral oncogene homolog (MYC) | NA  | NA    | 0.3 | 0.005 |   | Y |
| NM_007331    | Wolf-Hirschhorn syndrome candidate 1 (WHSC1)              | 1.3 | 0.052 | 0.3 | 0.047 | Y | Y |
| NM_005080    | X-box binding protein 1 (XBP1)                            | 3.0 | 0.025 | 0.5 | 0.087 | Y | Y |
| NM_000380    | XPA, DNA damage recognition and repair factor (XPA)       | NA  | NA    | 0.3 | 0.032 |   | Y |
| NM_006297    | X-ray repair cross complementing 1 (XRCC1)                | 1.3 | 0.142 | 0.4 | 0.047 |   | Y |
| NM_003651    | Y-box binding protein 3 (YBX3)                            | 3.9 | 0.020 | NA  | NA    |   | Y |
| NM_006106    | Yes associated protein 1 (YAP1)                           | 4.5 | 0.023 | 0.6 | 0.118 | Y | Y |
| NM_004926    | ZFP36 ring finger protein like 1 (ZFP36L1)                | 4.6 | 0.028 | 0.9 | 0.191 | Y |   |
